**Valuing experiential knowledge in health promotion:  
a new method to build up knowledge in France**

Anne Laurent

*A Laurent<sup>1</sup>, C Ferron<sup>2</sup>, National committee to promote EKHP<sup>1,2</sup>,  
P Berry<sup>3</sup>, B Soudier<sup>1</sup>, B Georgelin<sup>1</sup>, S Gaspard<sup>1</sup>, F Berdougou<sup>1</sup>, E Rush<sup>1</sup>,  
P Lombrai<sup>1</sup>*

<sup>1</sup>Société Française de Santé Publique, Laxou, France

<sup>2</sup>FNES, Saint-Denis, France

<sup>3</sup>Le Réverbère, Nantes, France

Contact: [anne.laurent@sfsp.fr](mailto:anne.laurent@sfsp.fr)

**Issue:**

Effectiveness analyses of health promotion (HP) interventions (HPI) abound nowadays in France, but few research details

how HPI work, nor explains how practitioners can translate conclusive evidence from the literature into action. Furthermore, large amounts of experiential knowledge remain untapped and undervalued. To close these gaps, a national multidisciplinary committee, comprising public officials, academics and practitioners, has worked since 2016 at designing a new method to build up knowledge in HP.

**CEKHP:**

The method aims at Capitalizing, collecting and circulating Experiential Knowledge in HP (CEKHP).

Committee members first investigated methods used in other countries to synthesize and share practical evidence, then drafted and experimented CEKHP in 11 different settings to test its relevance and applicability.

**Results:**

Key components of CEKHP are: 1/CEKHP consists in in-depth semi-structured interviews and offers a guideline template adjustable for various contexts and multiple public health issues (behaviors, environments, etc.); 2/a trained outsider, mastering 7 core competencies, must conduct CEKHP; 3/CEKHP includes a framework for reporting key mechanisms that influence HPI outcomes. Detailed mechanisms include: context, partnerships, key steps, barriers and levers, ethics, theoretical foundations (intervention models, evidence-based literature, etc.), transferability. A guidebook and a toolkit are published in 2020. CEKHP successfully disseminates within the French HP community. It is currently used as the main data collection tool in a research project investigating health promoting sports clubs (PROCeSS) and in a practice-focused project documenting tobacco prevention (DCAP).

**Lessons:**

Practitioners benefit from access to knowledge on how HPI work. CEKHP offers new tools to value and disseminate experiential knowledge. Given that policymakers increasingly prioritize funding in France on documented HPI, providing such tools and training is crucial.

**Key messages:**

- CEKHP offers a new method in the French context that has proven fruitful in various settings, for various public health issues, and can be useful to practitioners and researchers alike.
- Building up experiential knowledge with and for practitioners can be effective at both documenting practices and helping them gain new skills and better understanding of their interventions.
